# Supplementary material for: No speed dating please! Patterns of social preference in male and female house mice
Source: PubMed Central journal article supplement (PMC5525247; doi:10.1186/s12983-017-0224-y), 2017-07-24

Determination of Consistency of Choice:

1: Block-Count    2: Size of the last block [relative to the total amount with any satellite mouse]

"Hermann", male, GG

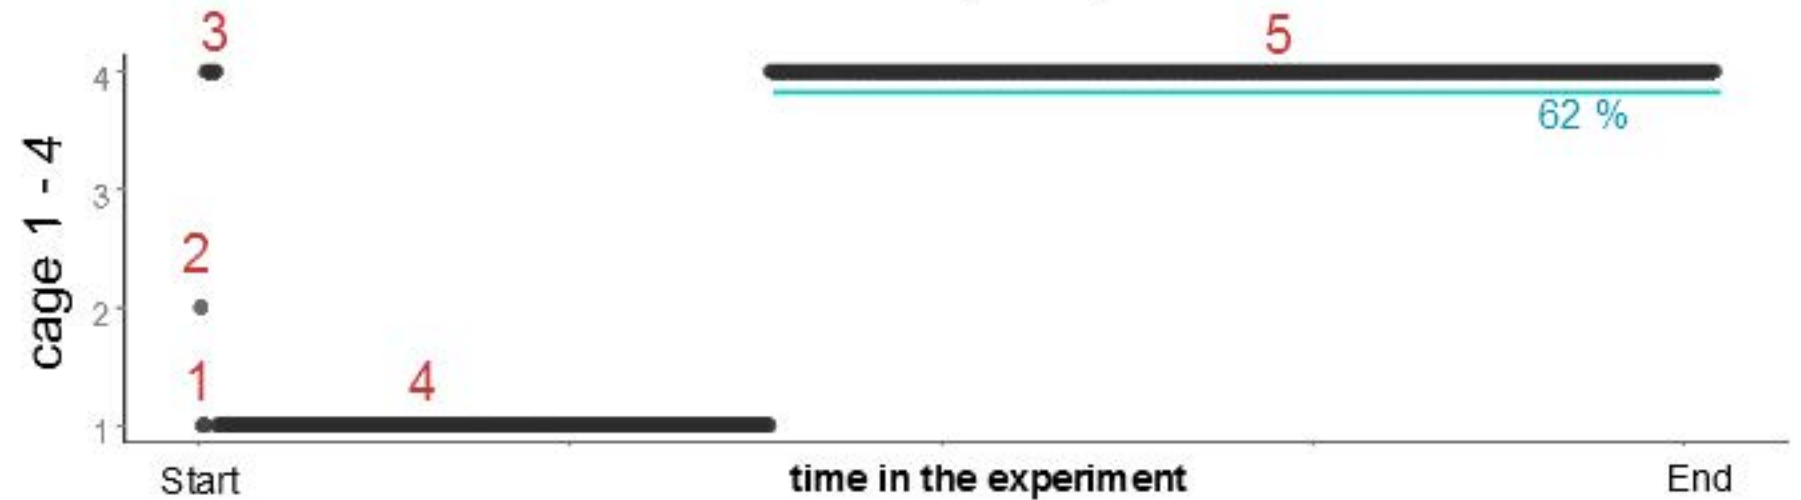

"Jacques", male, FF

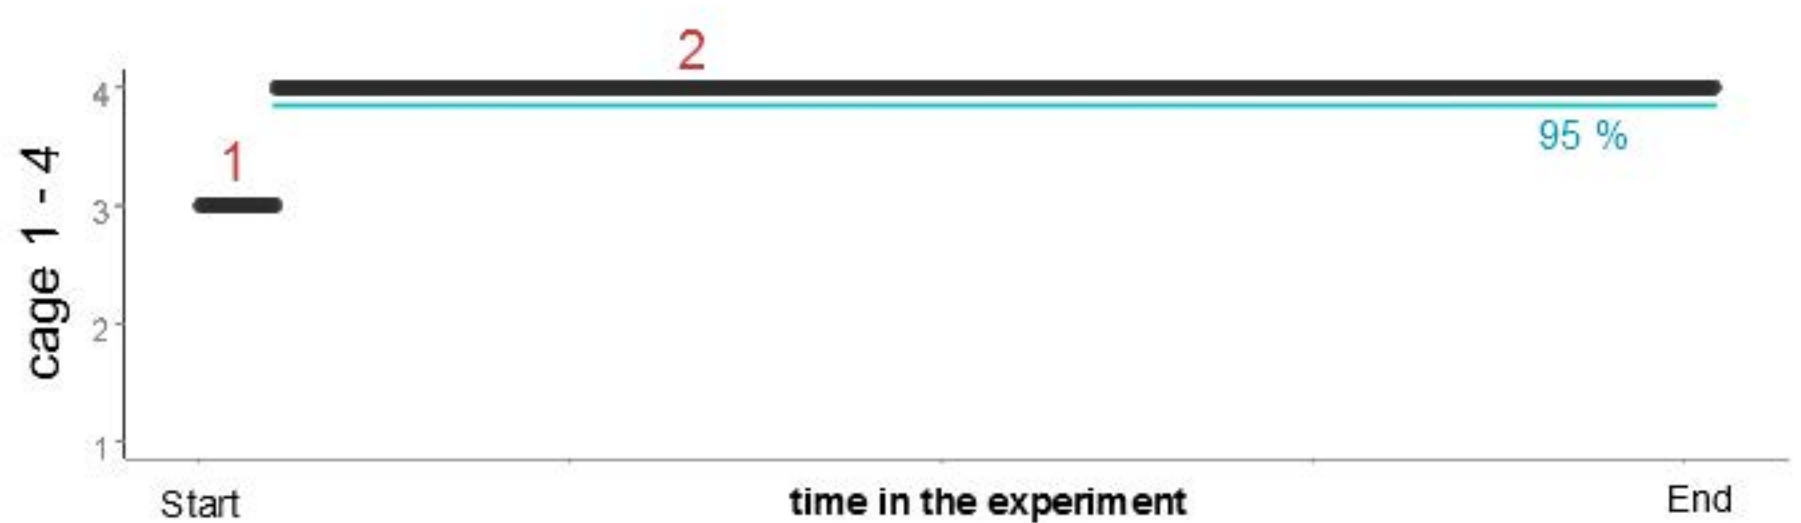

Supplement: 12983_2017_224_MOESM2_ESM.pdf [file 12983_2017_224_MOESM2_ESM.pdf]
