# Supplementary material for: No speed dating please! Patterns of social preference in male and female house mice
Source: PubMed Central journal article supplement (PMC5525247; doi:10.1186/s12983-017-0224-y), 2017-07-24

a)

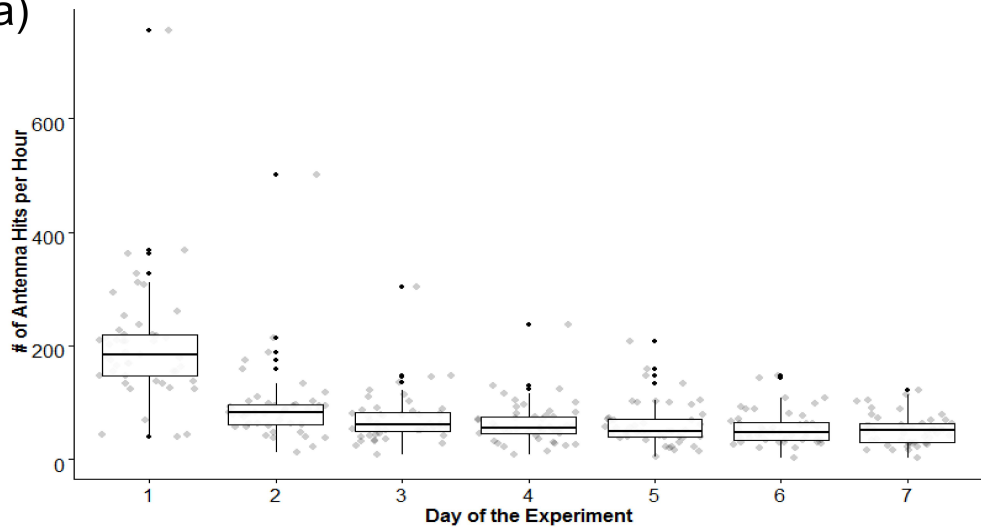

b)

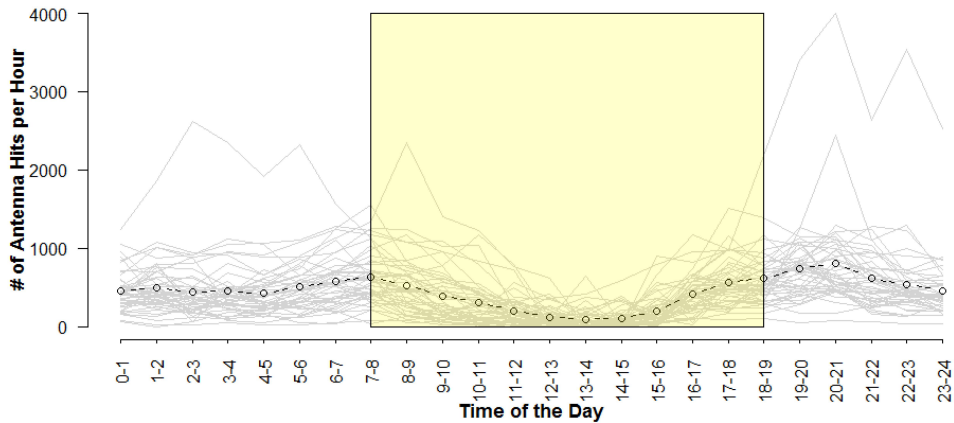

Supplement: 12983_2017_224_MOESM4_ESM.pdf [file 12983_2017_224_MOESM4_ESM.pdf]
